# Supplementary material
Source: publisher figshare collection journal article supplement (https://sage.figshare.com/ndownloader/files/12807815)
Supplement: Supplementary file 1 [file 12807815]

| Depth (cm) | Indeterminable pollen |  |
| --- | --- | --- |
|  | Included | Excluded |
| 5 | 150 | 88 |
| 10 | 180 | 103 |
| 15 | 161 | 92 |
| 20 | 401 | 178 |
| 25 | 405 | 198 |
| 30 | 285 | 77 |
| 35 | 435 | 168 |
| 40 | 234 | 144 |
| 45 | 177 | 100 |
| 50 | 60 | 31 |
| 55 | 109 | 60 |
| 60 | 66 | 39 |
| 65 | 119 | 63 |
| 70 | 43 | 20 |
| 75 | 67 | 26 |
| 80 | 149 | 92 |
| 85 | 100 | 56 |
| 90 | 154 | 116 |
| 95 | 152 | 72 |
| 100 | 12 | 8 |
| 105 | 52 | 26 |
| 110 | 158 | 60 |
| 115 | 100 | 46 |
| 120 | 118 | 56 |
| 125 | 160 | 70 |
| 130 | 26 | 8 |
| 135 | 114 | 40 |
| 140 | 98 | 54 |
| 145 | 92 | 30 |
| 150 | 130 | 30 |
| 155 | 80 | 28 |
| 160 | 106 | 44 |
| 165 | 214 | 76 |
| 170 | 146 | 62 |
| 175 | 142 | 60 |
| 180 | 200 | 112 |
| 185 | 134 | 56 |
| 190 | 92 | 34 |
| 195 | 94 | 48 |
| 200 | 144 | 48 |
| 205 | 52 | 24 |
| 210 | 82 | 28 |
| 215 | 42 | 14 |
| 220 | 78 | 12 |
| 225 | 144 | 38 |
